# Supplementary material for: Giant photoluminescence enhancement in MoSe2 monolayers treated with oleic acid ligands
Source: Royal Society of Chemistry journal article supplement (doi:10.1039/d0na01014f), 2021-01-01
Supplement: d0na01014f1.pdf [file d0na01014f1.pdf]

## Supporting Information

# Giant Photoluminescence Enhancement in MoSe<sub>2</sub> Monolayers treated with Oleic Acid Ligands

Arelo O.A Tanoh<sup>1,2</sup>, Jack Alexander-Webber<sup>3</sup>, Ye Fan<sup>3</sup>, Nicholas Gauriot<sup>1</sup>, James Xiao<sup>1</sup>, Raj Pandya<sup>1</sup>, Zhaojun Li<sup>1</sup>,  
Stephan Hofmann<sup>3</sup>, Akshay Rao<sup>1\*</sup>

<sup>1</sup>Cavendish Laboratory, Cambridge, JJ Thomson Avenue, CB3 0HE, Cambridge, United Kingdom

<sup>2</sup>Cambridge Graphene Centre, University of Cambridge, 9 JJ Thomson Avenue, Cambridge, CB3 0FA, Cambridge,  
United Kingdom

<sup>3</sup>Department of Engineering, University of Cambridge, JJ Thomson Avenue, CB3 0FA Cambridge, United Kingdom

\*E-mail: [ar525@cam.ac.uk](mailto:ar525@cam.ac.uk)

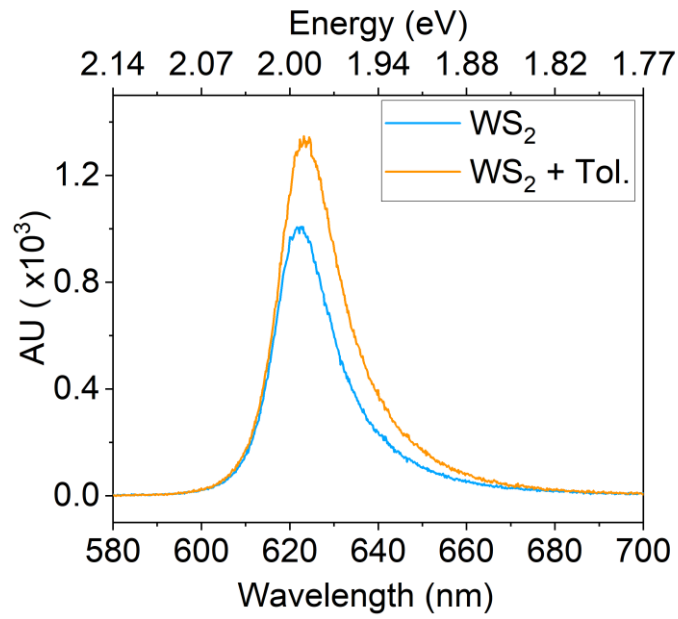

**SI Figure 1:** Effect of Toluene on WS<sub>2</sub> PL

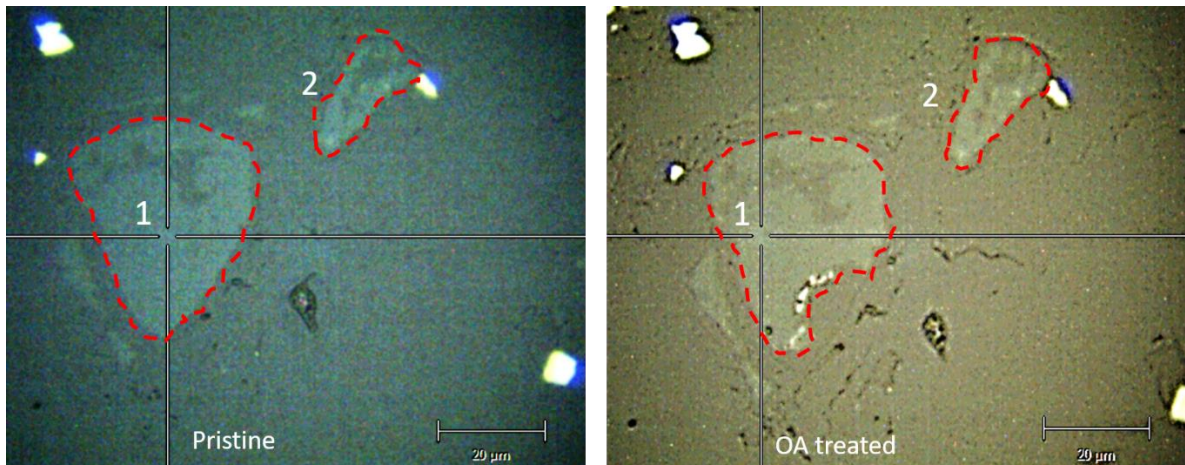

**SI Figure 2:** Optical micrographs of MoSe<sub>2</sub> monolayers before (LHS) and after (RHS) OA treatment. Scalebar represents 20 μm. Slight delamination in monolayer 1 attributed to surface tension effects of OA.

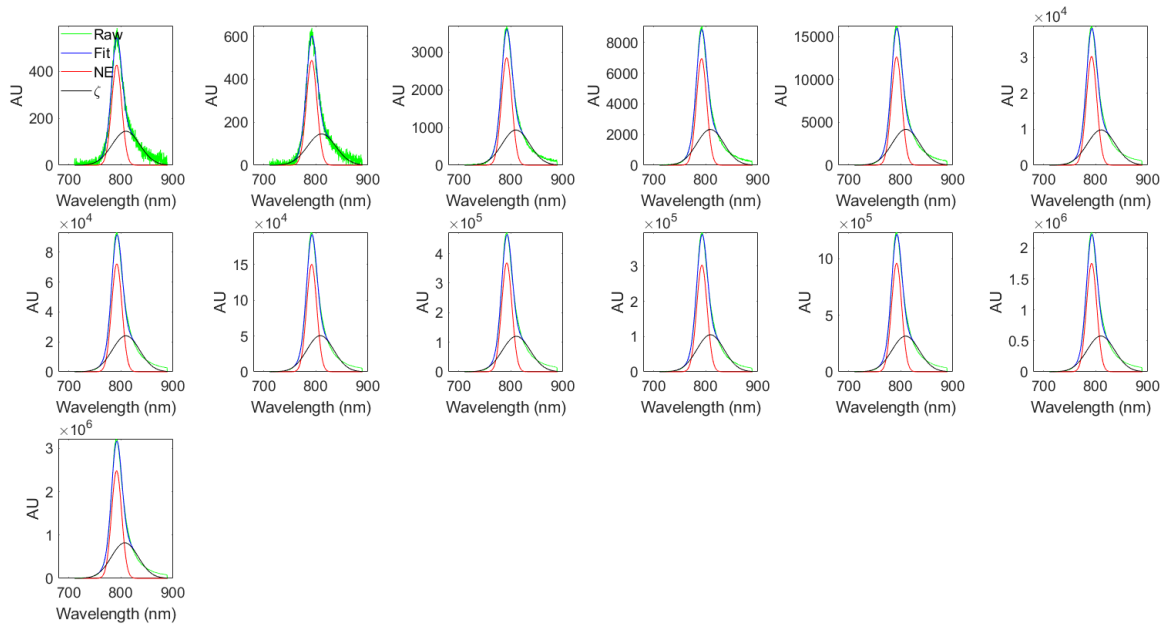

**SI Figure 3:** Gaussian fits of pristine MoSe<sub>2</sub> monolayer PL spectra

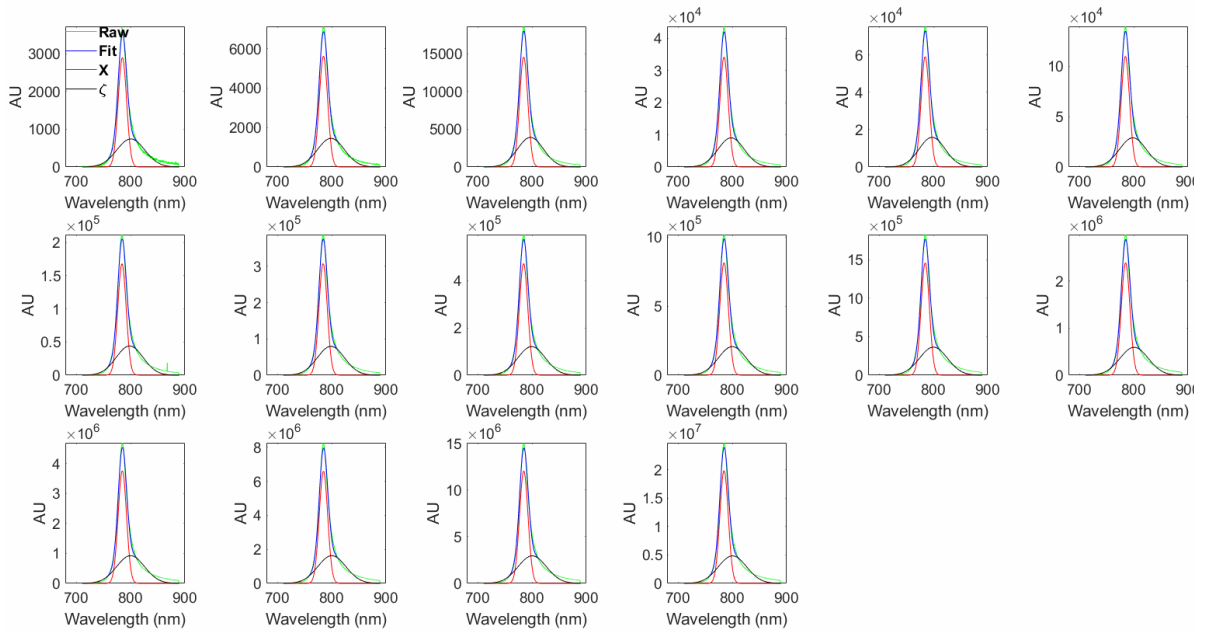

**SI Figure 4:** Gaussian fits of OA treated MoSe<sub>2</sub> monolayer PL spectra

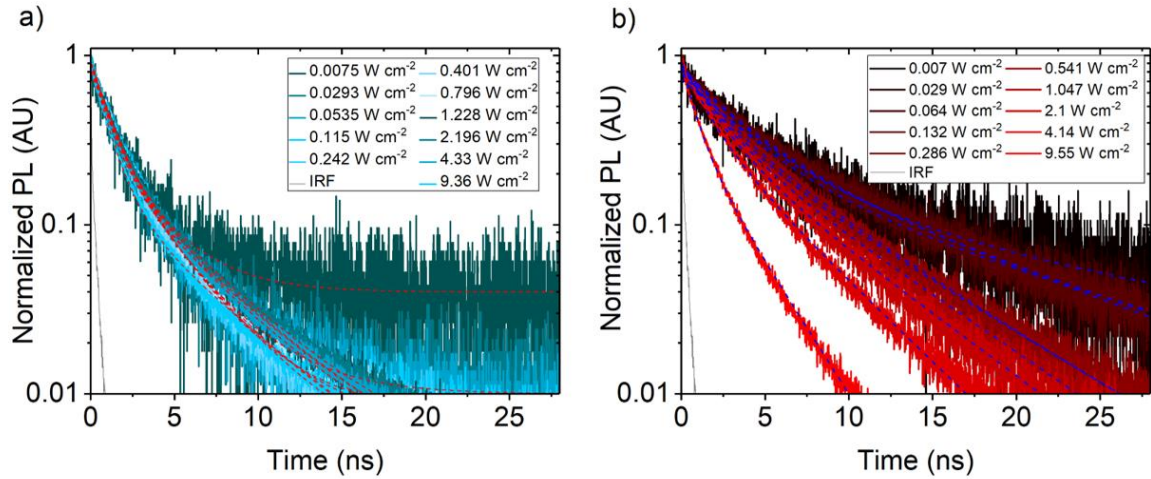

**SI Figure 5 a-b:** Time resolved photoluminescence signals for pristine (blue) and OA treated (red) samples with bi-exponential decay fits (red dashed line in pristine spectra and blue dashed lined in OA treated spectra).

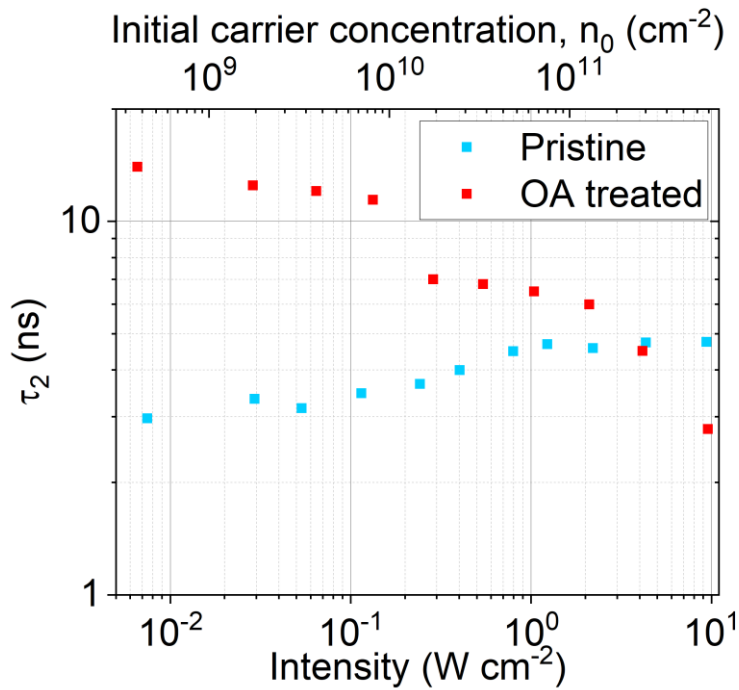

**SI Figure 6:** Variation of slow decay component,  $\tau_2$ , of pristine (blue) and OA treated (red) MoSe<sub>2</sub> time resolved PL signals with initial carrier concentration and pump intensities (W cm<sup>-2</sup>).

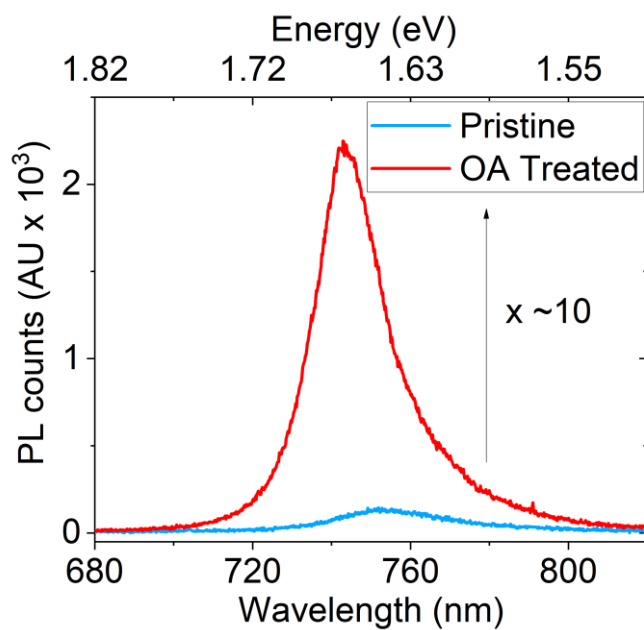

**SI Figure 7:** Raw PL spectra of a single spot on a WSe<sub>2</sub> monolayer on Si-SiO<sub>2</sub> (90 nm) treated with OA.

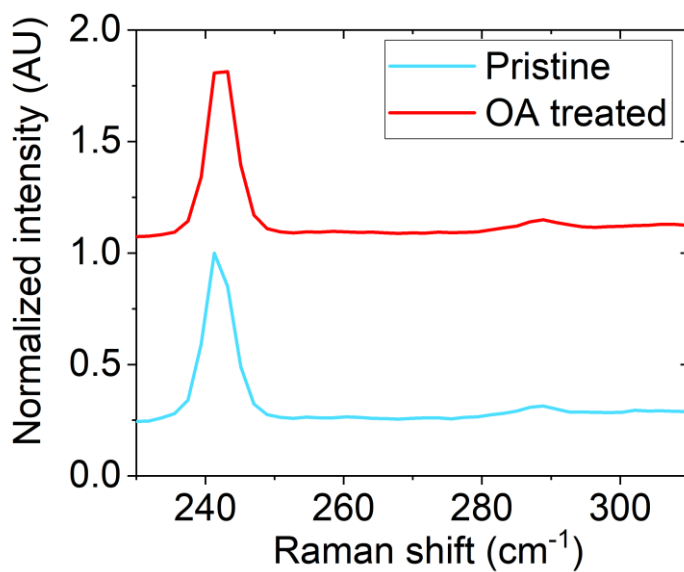

**SI Figure 8:** Raman spectra of pristine (blue) and OA treated MoSe<sub>2</sub> monolayers on glass substrate.
